# THE AMERICAN JOURNAL OF PSYCHIATRY

---

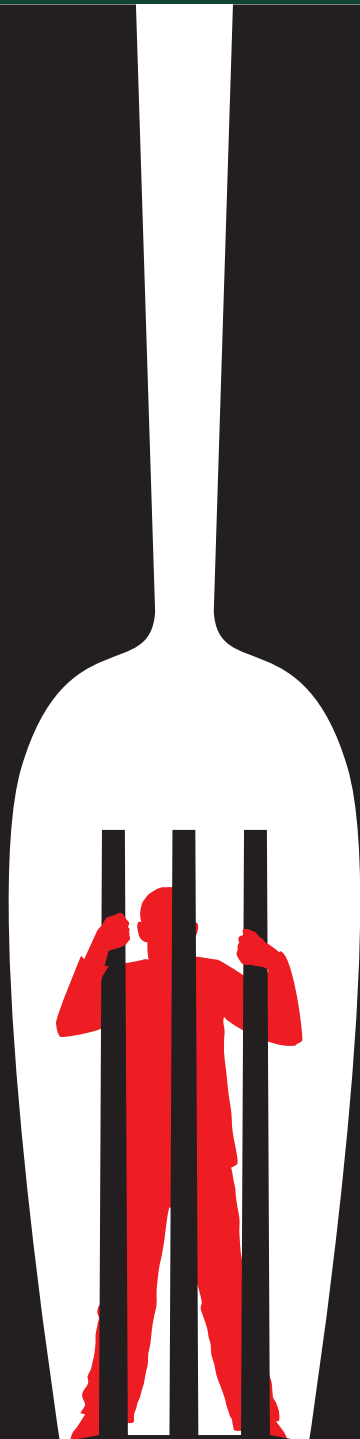

◀ **Increased Mortality in Bulimia Nervosa and Other Eating Disorders**

Scott J. Crow, M.D., et al. 1342

◀ **The Efficacy of Self-Help Group Treatment and Therapist-Led Group Treatment for Binge Eating Disorder**

Carol B. Peterson, Ph.D., et al. 1347

**Randomized Controlled Trial of Outpatient Mentalization-Based Treatment Versus Structured Clinical Management for Borderline Personality Disorder**

Anthony Bateman, M.A, F.R.C.Psych. and Peter Fonagy, Ph.D., F.B.A. 1355

**Adjunctive Divalproex Versus Placebo for Children With ADHD and Aggression Refractory to Stimulant Monotherapy**

Joseph C. Blader, Ph.D., et al. 1392

**Continuing Medical Education** 1437

**December 2009**

**Volume 166 • Number 12**

---

Official Journal of the  
AMERICAN PSYCHIATRIC ASSOCIATION

---

[ajp.psychiatryonline.org](http://ajp.psychiatryonline.org)
