# READ The American Journal of PSYCHIATRY ONLINE

## ONLINE BENEFITS

### AJP in Advance

Receive key research articles posted on the AJP website well in advance of their appearance in print.

### Back Issue Access

Gain access to back issues starting with Volume 1, Issue 1 of the American Journal of Insanity in 1844. (Available to institutions as a separate one-time purchase.)

### AJP CME

Take interactive quizzes that offer AMA PRA Category 1 Credits™ for selected articles from each issue (with paid subscription to the CME Course Program).

### AJP Audio

Listen to MP3-format program summarizing findings from key articles from each issue.

### Residents' Journal

Read additional AJP articles and features that have most value to residents in their training.

### Powerful Searching

Search by author, keyword, and/or citation details—within any one journal, across the entire PsychiatryOnline journal collection, or across all HighWire journals.

### PubMed, CrossRef, and Google Scholar links

Explore everything from cited references to abstracts and full text; to similar articles; to other articles by the same lead authors.

### eTOCs

Get advanced email alerts with the table of contents of the latest issue.

ACTIVATE  
NOW!

IT'S AS EASY AS...

2 Under  
SUBSCRIBE  
NOW, click  
"Activate  
Your Online  
Access"

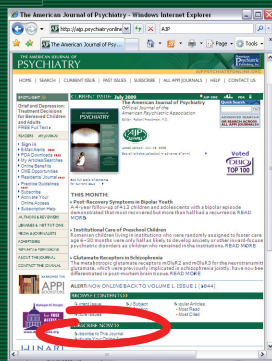

3 Enter your APA Member Number. (This  
can be found on your mailing label.)

AJP 3000056866 CAR-RT LOT88 C-105  
John Q Sample  
Mental Health Professional  
1000 Wilson Blvd STE 1825  
Arlington VA 22209-3924 01654

\*In most cases the number on your label will be your Member Number; if it is not, enter your APA Member Number (with enough leading zeros to create 10 digits).

For more information or if you cannot locate your customer number, please contact APPI Customer Service:

1.800.368.5777  
APPI@PSYCH.ORG

# get CME from AJP

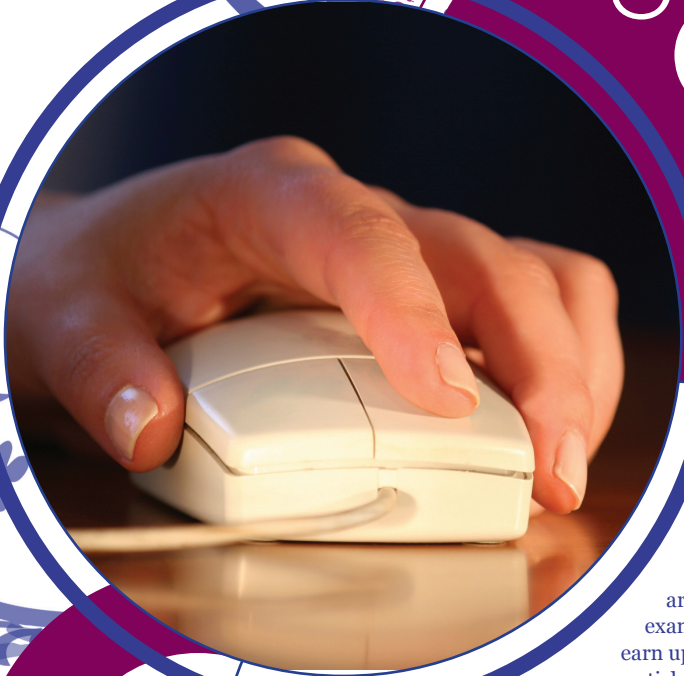

Brief companion exams are created for three of the most influential articles from each issue. By reading the articles and completing the online exams, you can test your knowledge and earn up to 1 *AMA PRA Category 1 Credit*<sup>™</sup> per article. Correct answers are highlighted for your reference upon completion of the course; there is no minimum threshold score necessary for the credit. A

link from the question to the correct answer in context will also be highlighted in the associated article, thus extending the learning experience.

CME credit is only provided online, and a subscription to the AJP CME program is required. From the moment you subscribe to the AJP CME program, you will be able to select from 72 courses from among 40 possible subject areas. You'll also be able to access the next 33 courses as they become available. For more information and pricing, please go to <http://cme.psychiatryonline.org/misc/aboutajpcme.shtml>

This activity is sponsored by the American Psychiatric Association. The American Psychiatric Association is accredited by the Accreditation Council for Continuing Medical Education to provide continuing medical education for physicians. The American Psychiatric Association designates each educational activity for a maximum of 1 *AMA PRA Category 1 Credit*<sup>™</sup>. Physicians should only claim credit commensurate with the extent of their participation in the activity.

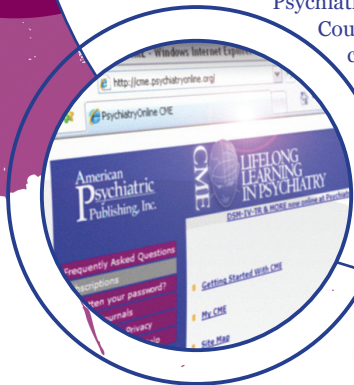

Fulfill your CME requirement while staying current on the latest advances in psychiatry.  
Subscribe to AJP CME!

A14 Editorial Board

A16 Highlights of this issue

Editorial

- 379 **Towards ICD-11 and DSM-V: issues beyond 'harmonisation'**  
A. Jablensky
- 381 **Portrait of fellow patient – psychiatry in pictures**  
Denis Reed

Special article

- 382 **Harmonisation of ICD-11 and DSM-V: opportunities and challenges**  
M. B. First
- 390 **The electroshock riddle: effective but rejected – in 100 words**  
Max Fink

Reappraisal

- 391 **Whither DSM-V?**  
Allen Frances

Review article

- 393 **Voxel-wise meta-analysis of grey matter changes in obsessive-compulsive disorder**  
J. Radua and D. Mataix-Cols
- 402 **Lady Audley's Secret (1862), Mary Elizabeth Bradon – psychiatrists in 19th-century fiction**  
Fiona Subotsky

Papers

- 403 **Retrospective views of psychiatric in-patients regaining mental capacity**  
G.S. Owen, A.S. David, P. Hayward, G. Richardson, G. Szmukler, and M. Hotopf
- 408 **Dietary pattern and depressive symptoms in middle age**  
T.N. Akbaraly, E.J. Brunner, J.E. Ferrie, M.G. Marmot, M. Kivimaki, and A. Singh-Manoux
- 414 **Negative parental discipline, conduct problems and callous-unemotional traits: monozygotic twin differences study**  
E. Viding, N.M.G. Fontaine, B.R. Oliver, and R. Plomin

- 420 **Reactions to abortion and subsequent mental health**

D.M. Fergusson, L.J. Horwood, and J.M. Boden

- 427 **Analysis of trauma exposure, symptomatology and functioning in Jewish Israeli and Palestinian adolescents**

A. Al-Krenawi, J.R. Graham, and Y. Kanat-Maymon

- 433 **Outcomes of people with psychotic disorders in a community-based rehabilitation programme in rural India**

S. Chatterjee, A. Pillai, S. Jain, A. Cohen, and V. Patel

- 440 **Guided and unguided self-help for social anxiety disorder: randomised controlled trial**

T. Furmark, P. Carlbring, E. Hedman, A. Sonnenstein, P. Clevberger, B. Bohman, A. Eriksson, A. Hollen, M. Frykman, A. Holmstrom, E. Sparthan, M. Tillfors, E. N. Ihrfelt, M. Spak, A. Eriksson, L. Ekselius, and G. Andersson

- 448 **Effectiveness and cost-effectiveness of a stepped care intervention for alcohol use disorders in primary care: pilot study**

C. Drummond, S. Coulton, D. James, C. Godfrey, S. Parrott, J. Baxter, D. Ford, B. Lervy, S. Rollnick, I. Russell, and T. Peters

- 456 **The original 'magic bullet' is 100 years old – extra**  
Frank Heynick

Short reports

- 457 **Early course of bipolar disorder in high-risk offspring: prospective study**  
A. Duffy, M. Alda, T. Hajek, and P. Grof
- 459 **Gender differences in healthcare service utilisation 1 year before suicide: national record linkage study**  
C.-M. Chang, S.-C. Liao, H.-C. Chiang, Y.-Y. Chen, K.-C. Tseng, Y.-L. Chau, H.-J. Chang, M.-B. Lee

Columns

- 461 **Correspondence**
- 464 **Book reviews**
- 468 **Contents of Advances in Psychiatric Treatment**
- 469 **Contents of the American Journal of Psychiatry**
- 470 **From the Editor's desk**

# The Residents' JOURNAL

## Last Issue's Table of Contents

- 1 Introduction  
Logan Kristen Wink, M.D.
- 2 Interview With Dr. William G. Kronenberg  
Logan Kristen Wink, M.D.
- 4 A Family Disease: Case Exploration  
Martin H. Plawecki, M.D., Ph.D.
- 5 Resident Mom  
Renee Gill, M.D.
- 6 Borderline Personality Disorder: The Family Connection  
R. Nicole Bonham, M.D.
- 8 Coloring by Numbers: *Satir Step by Step: A Guide to Creating Change in Families*  
Vivek Prasad, M.D.

The Residents' Journal is sent free-of-charge to all psychiatry residents. Anyone interested in being included on the distribution list should contact Angela Moore, the Residents' Journal staff editor at [ajp@psych.org](mailto:ajp@psych.org) with "Subscribe to Residents' Journal" in the subject line.

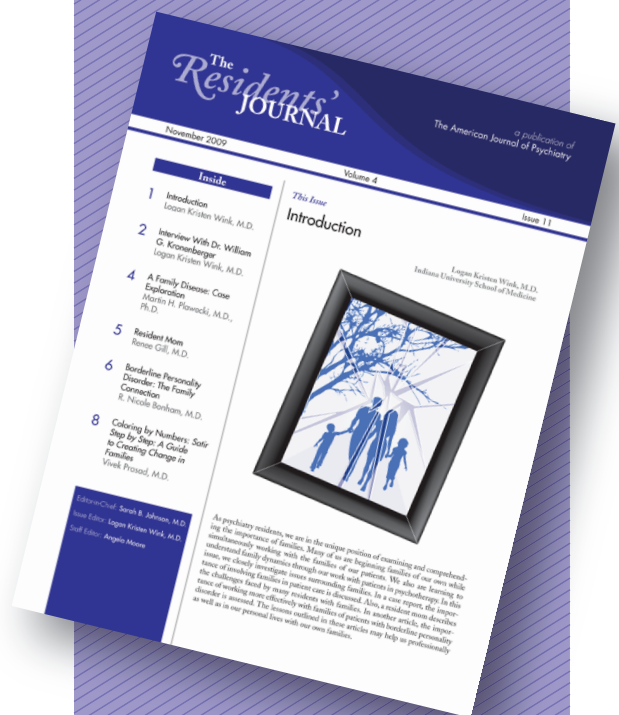

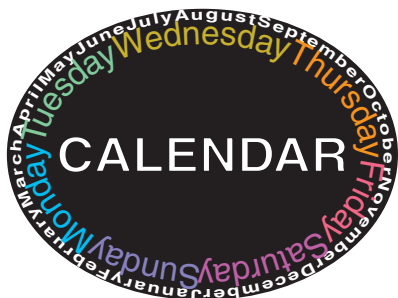

For free listing of your organization's official annual or regional meeting, please send us the following information: sponsor, location, inclusive dates, type and number of continuing education credits (if available), and the name, address, and telephone number of the person or group to contact for more information. In order for an event to appear in our listing, all notices and changes must be received at least 6 months in advance of the meeting and should be addressed to:

*Calendar, American Journal of Psychiatry, 1000 Wilson Boulevard, Suite 1825, Arlington, VA 22209-3901, jblair@psych.org (e-mail).*

*Because of space limitations, only listings of meetings of the greatest interest to Journal readers will be included.*

---

## JANUARY 2010

**Jan 13–17**, The American Psychoanalytic Association (APsaA) annual National Meeting, New York. Contact: [www.apsa.org/Meetings/2010\\_National\\_Meeting.aspx](http://www.apsa.org/Meetings/2010_National_Meeting.aspx)

---

## MARCH

**March 17–20**, 21st Annual Meeting, American Neuropsychiatric Association, Tampa, Fla. Contact: [www.anpaonline.org](http://www.anpaonline.org) (web site).

**March 17–20**, 4th Biennial Conference of the ISBD, Sao Paulo, Brazil. Contact: [isbd2010@icms.com.au](mailto:isbd2010@icms.com.au) (e-mail), [www.isbd2010.org](http://www.isbd2010.org) (web-site).

---

## APRIL

**April 9–11**, The Annual Fay Lecture Series in Analytical Psychology, "Connecting with South Africa: Inter-Cultural Communication and Understanding," Texas A&M University, College Station, Texas. Contact: (979) 845-2530 tel, [drosen@psych.tamu.edu](mailto:drosen@psych.tamu.edu) (e-mail).

---

## MAY

**May 20–23**, 54th Annual Meeting of the American Academy of Psychoanalysis and Dynamic Psychiatry, New Orleans, LA. Contact: Executive Office,

American Adademy of Psychoanalysis and Dynamic Psychiatry, PO Box 30, Bloomfield, CT 06002; (888) 691-8281, (860) 286-0787, [info@aapdp.org](mailto:info@aapdp.org) (e-mail), [www.aapdp.org](http://www.aapdp.org) (web site).

**May 22–27**, 163rd Annual Meeting of the American Psychiatric Association, New Orleans, LA. Contact: Cathy Nash, APA Annual Meetings Dept., 1000 Wilson Blvd., Ste. 1825, Arlington, VA 22209; (703) 907-7822.

---

## SEPTEMBER

**September 14–19**, 1st joint annual meeting of the EEG and Clinical Neuroscience Society (ECNS), International Society for Neuroimaging in Psychiatry (ISNIP) and the International Society for Brain Electromagnetic Topography (ISBET), Istanbul, Turkey. Contact: Kemal Arikan [mkarikan@istanbul.edu.tr](mailto:mkarikan@istanbul.edu.tr) (e-mail) [www.ecns2010.com](http://www.ecns2010.com) (web site).

---

## OCTOBER

**October 14–17**, 62nd Institute on Psychiatric Services, American Psychiatric Association, Boston, MA. Contact: Jill Gruber, APA Annual Meetings Dept., 1000 Wilson Blvd., Ste. 1825, Arlington, VA 22209; (703) 907-7815.

**October 26–31**, 57th Annual Meeting of the American Academy of Child and Adolescent Psychiatry, New York, NY.

Contact: AACAP, 3615 Wisconsin Avenue, N.W., Washington, DC 20016-3007; (202) 966-7300 (tel), (202) 966-2891 (fax), [meetings@aacap.org](mailto:meetings@aacap.org) (e-mail), [www.aacap.org](http://www.aacap.org) (web site).

---

## MAY 2011

**May 14–19**, 164th Annual Meeting of the American Psychiatric Association, Honolulu, HI. Contact: Cathy Nash, APA Annual Meetings Dept., 1000 Wilson Blvd., Ste. 1825, Arlington, VA 22209; (703) 907-7822.

---

## OCTOBER

**October 18–23**, 58th Annual Meeting of the American Academy of Child and Adolescent Psychiatry, Toronto, Ontario. Contact: AACAP, 3615 Wisconsin Avenue, N.W., Washington, DC 20016-3007; (202) 966-7300 (tel), (202) 966-2891 (fax), [meetings@aacap.org](mailto:meetings@aacap.org) (e-mail), [www.aacap.org](http://www.aacap.org) (web site).

**October 27–30**, 63rd Institute on Psychiatric Services, American Psychiatric Association, San Francisco, CA. Contact: Jill Gruber, APA Annual Meetings Dept., 1000 Wilson Blvd., Ste. 1825, Arlington, VA 22209; (703) 907-7815.

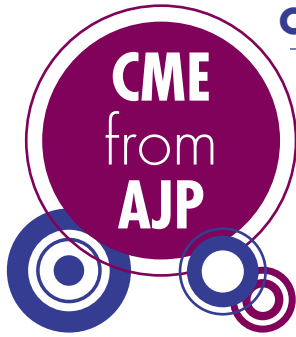

## Continuing Medical Education

Three articles in this issue form the basis of a short course with questions that can be answered for up to 1 *AMA PRA Category 1 Credit™* each by visiting <http://cme.psychiatryonline.org/> and clicking on “American Journal of Psychiatry CME.”

CME credit is issued only online, and a paid subscription to the AJP CME course program is required.

This month's courses appear on pages 1437–1440.

**FREE AUDIO!**

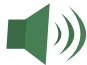

### *Have You Heard?*

You can listen to highlights of *The American Journal of Psychiatry* by downloading a monthly free .mp3 audio file from our web site (<http://ajp.psychiatryonline.org/misc/audio.dtl>) or by subscribing to the AJP Audio podcast at iTunes or other feed reader (e.g., NewzCrawler, FeedDemon, Bloglines, Google Reader). Presented by Deputy Editor Dr. Susan Schultz or by Editorial Director Michael Roy, each month's audio lasts approximately 30 minutes and covers several research articles, the Treatment in Psychiatry feature, and one or two editorials.

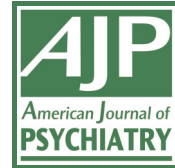

Coming in the January 2010 issue\*

## THE AMERICAN JOURNAL OF PSYCHIATRY

*Early Risk Factors and Developmental Pathways to Chronic High Inhibition and Social Anxiety Disorder in Adolescence*

M.J. Essex, M.H. Klein, M.J. Slattery, H.H. Goldsmith, and N.H. Kalin

*Overgeneralization of Conditioned Fear as a Pathogenic Marker of Panic Disorder*

S. Lissek, S. Rabin, R.E. Heller, D. Lukenbaugh, M. Geraci, D.S. Pine, and C. Grillon

*Association of Poor Childhood Fear Conditioning and Adult Crime*

Y. Gao, A. Raine, P.H. Venables, M.E. Dawson, and S.A. Mednick

*Amygdala Activation During Emotion Processing of Neutral Faces in Children With Severe Mood Dysregulation Versus ADHD or Bipolar Disorder*

M.A. Brotman, B.A. Rich, A.E. Guyer, J.R. Lunsford, S.E. Horsey, M.M. Reising, L.A. Thomas, S.J. Fromm, K. Towbin, D.S. Pine, and E. Leibenluft

**\*Can't wait? Visit [ajp.psychiatryonline.org](http://ajp.psychiatryonline.org) and click the “AJP in Advance” logo to see all articles uploaded in advance of print!**
